# Supplementary material
Source: Springer Nature journal article supplement (https://www.springermedizin.de/resource/supplementary/12891_2010_971_MOESM2_ESM.pdf/9506830)
Supplement: MOESM2 [file 9506830]

# Experimental group

Geriatric assessment

**High risk patients**

Geriatric suggestions

**Non-high risk patients**

Routine care

Postoperative  
Geriatric assessment

Revise postoperative  
care plan if necessary
